# Supplementary material for: Construction of a BC3-based TM single-atom catalyst for efficient reduction of CO2 to CH4: a computational study
Source: Royal Society of Chemistry journal article supplement (doi:10.1039/d3cp01400b), 2023-01-01
Supplement: d3cp01400b1.pdf [file d3cp01400b1.pdf]

## Supplementary Information for

### Construction of BC<sub>3</sub>-based TM Single-atom Catalyst for Efficient Reduction of CO<sub>2</sub>

#### to CH<sub>4</sub>: A Computational Study

Jianxin Ou,<sup>a</sup> Liying Pan,<sup>a</sup> and Xiangmei Duan<sup>\*a,b</sup>

<sup>a</sup>*School of Physical Science and Technology, Ningbo University, Ningbo, 315211, China*

<sup>b</sup>*Laboratory of Clean Energy Storage and Conversion, Ningbo University, Ningbo, China*

\*Corresponding authors.

E-mail address: [duanxiangmei@nbu.edu.cn](mailto:duanxiangmei@nbu.edu.cn)

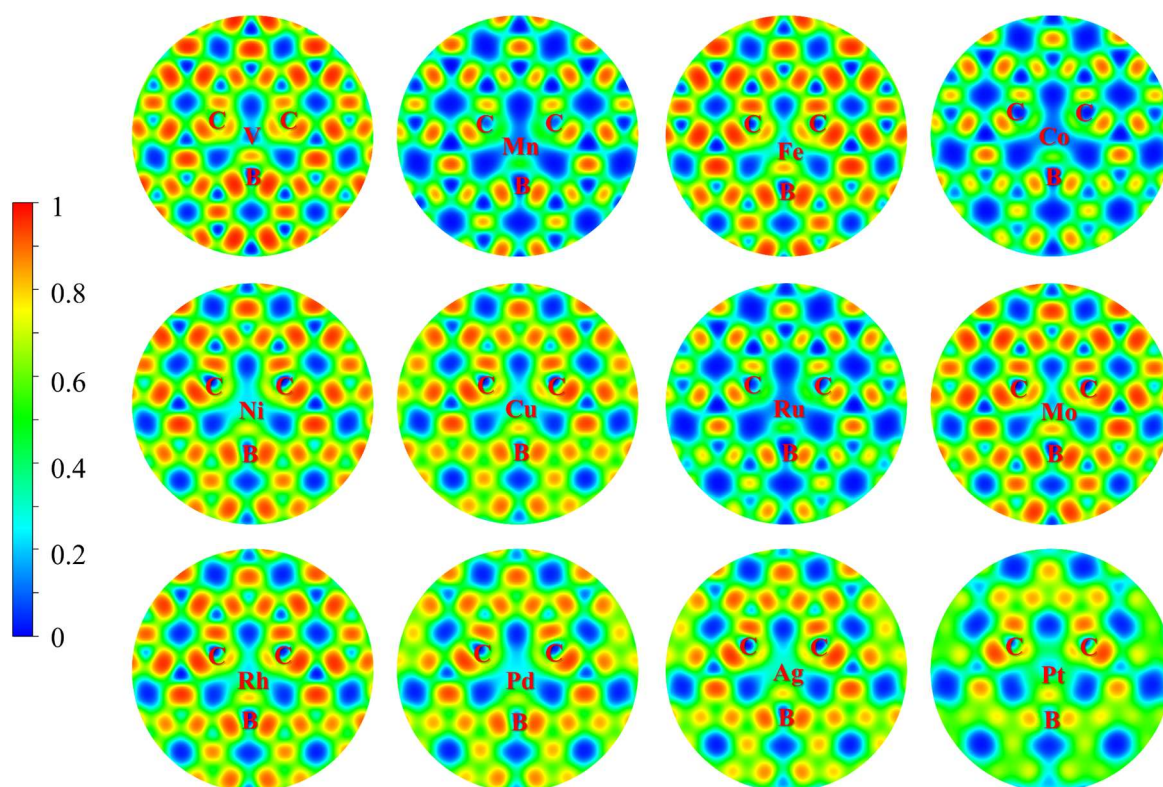

**Fig. S1** The calculated electron localization function (ELF) for TM@BC<sub>3</sub>.

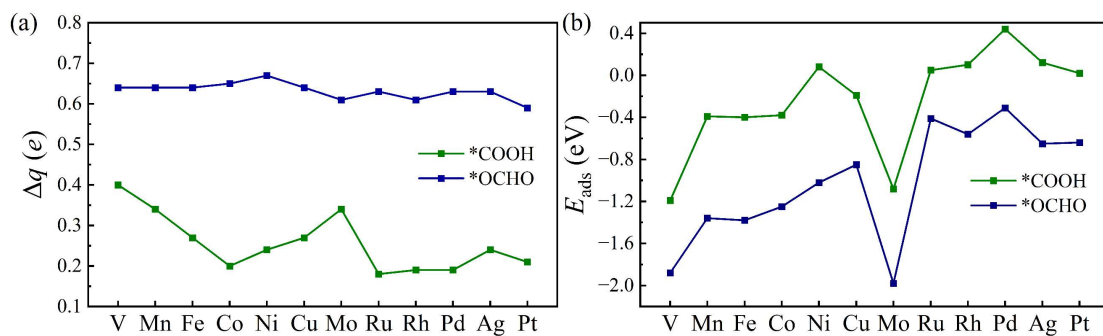

**Fig. S2** (a) Charges obtained from the substrates and (b) the adsorption energies of \*COOH and \*OCHO.

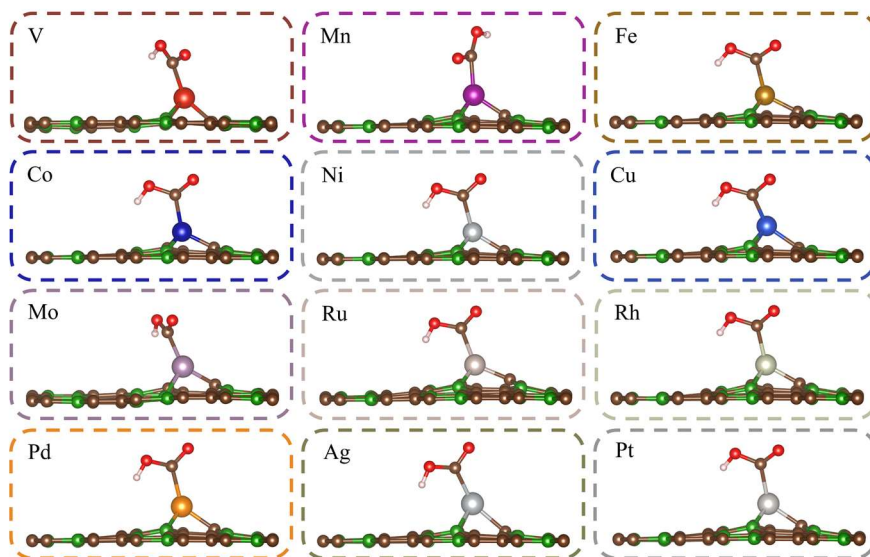

**Fig. S3** The optimal structures for \*COOH on TM@BC<sub>3</sub>.

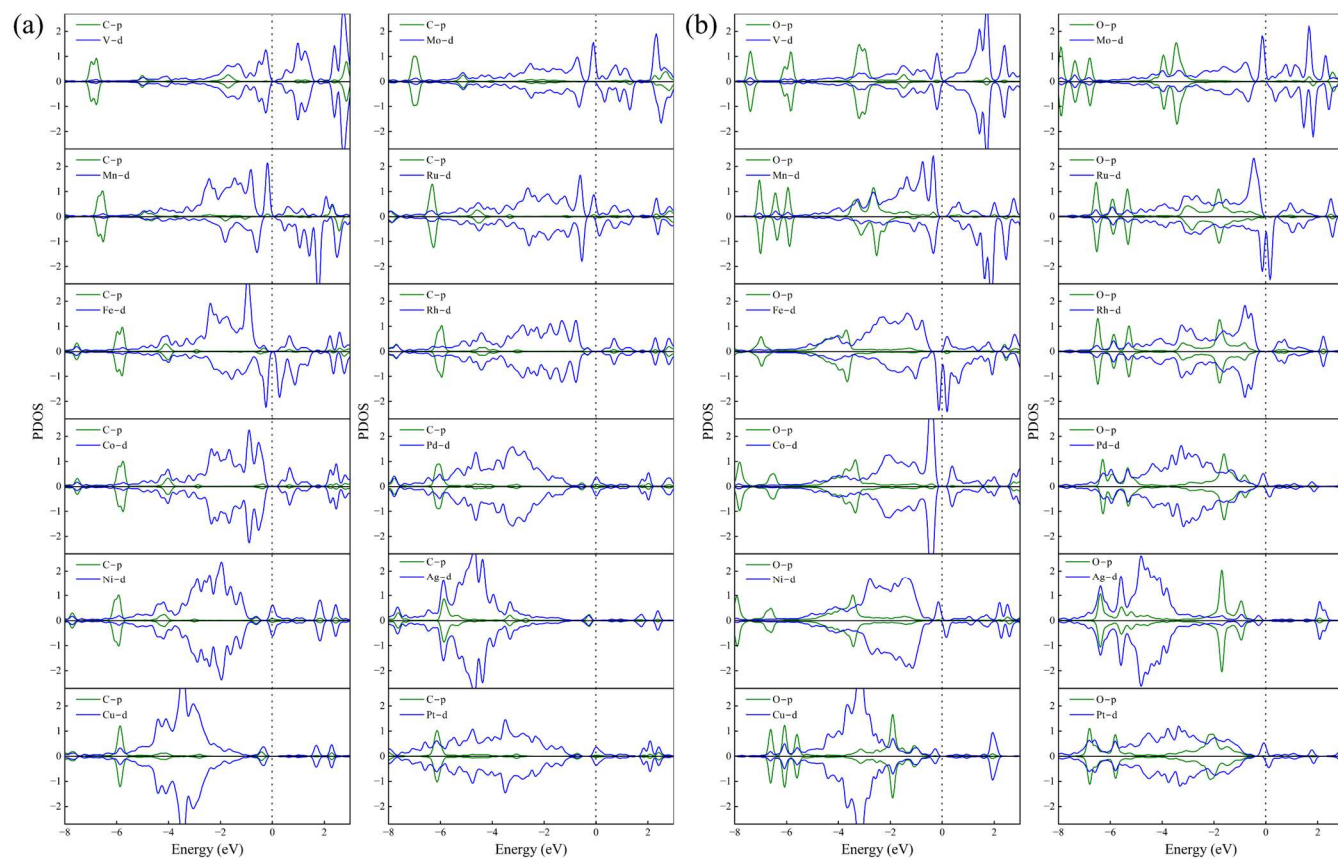

**Fig. S4** PDOS of (a) \*COOH and (b) \*OCHO on 12 substrates.

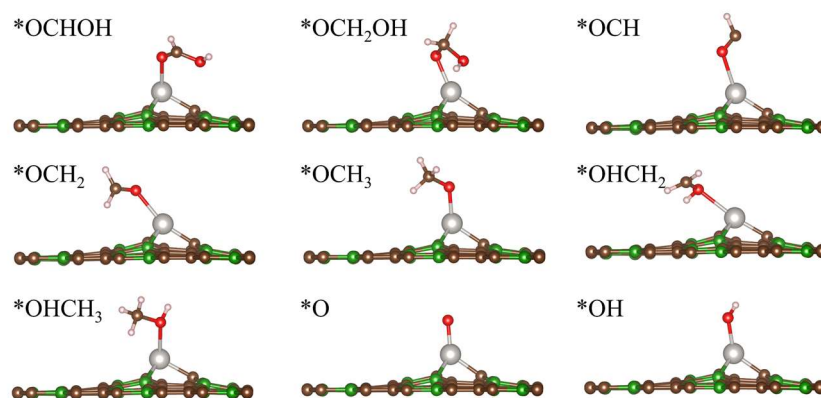

**Fig. S5** The optimal structures of the intermediates on Pt@BC<sub>3</sub>.

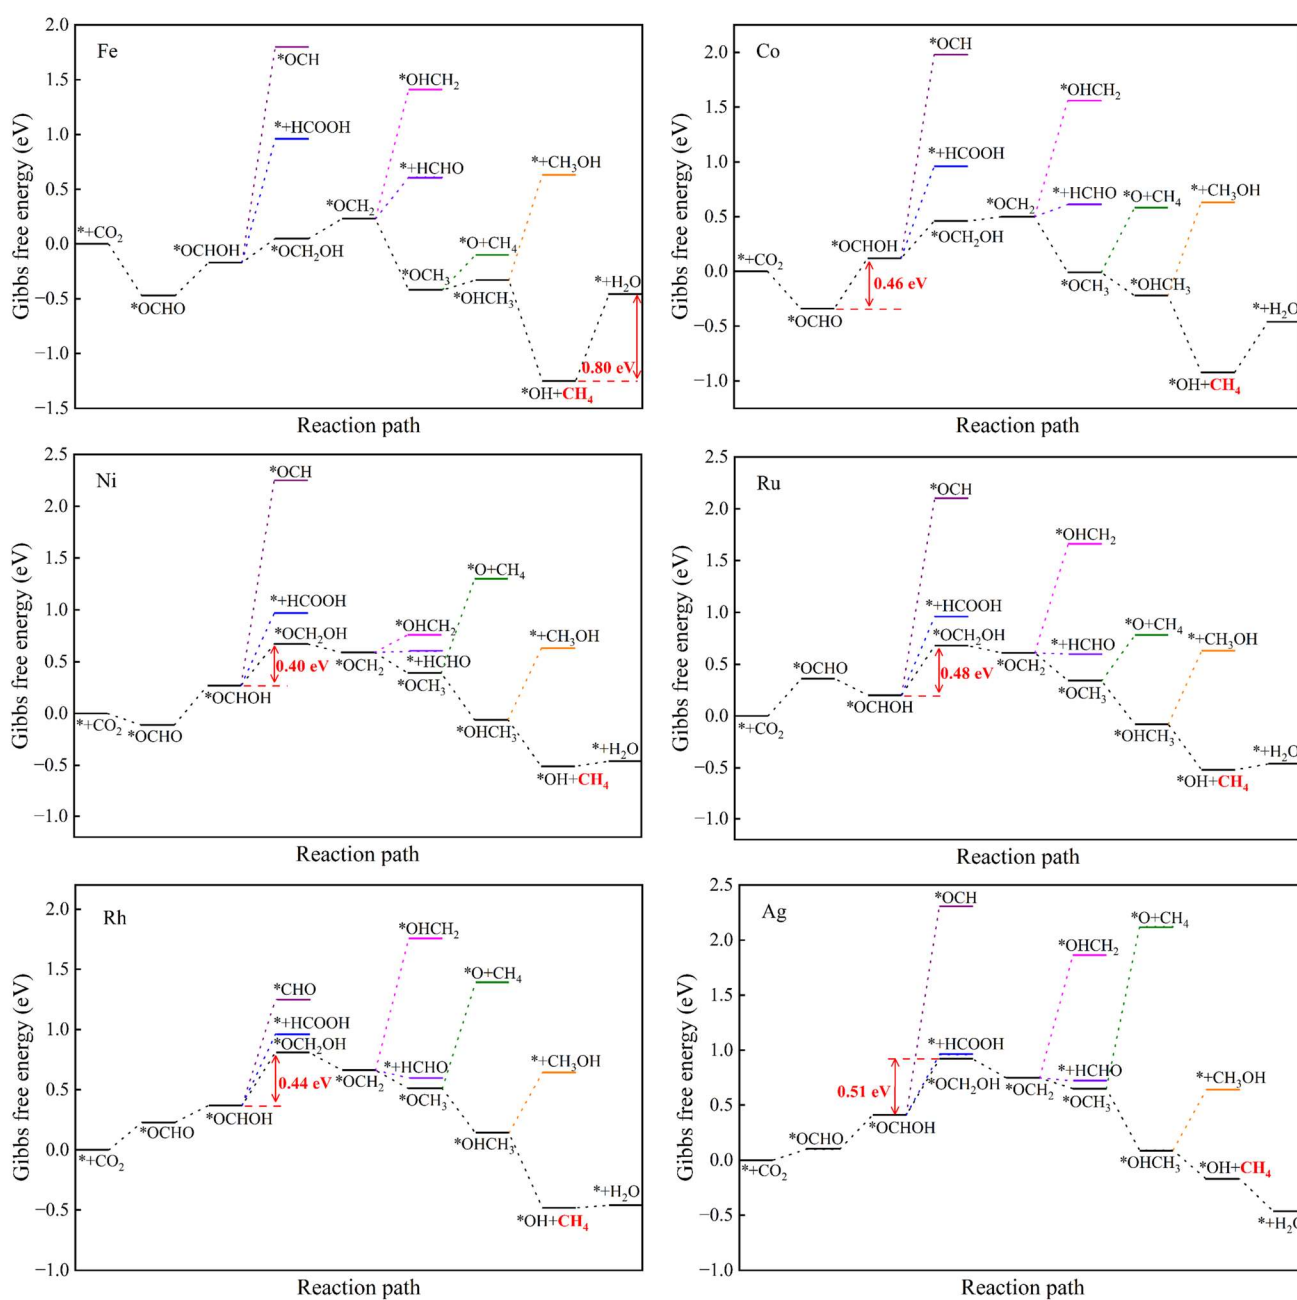

**Fig. S6** The Gibbs free energy diagrams of CO<sub>2</sub>RR on TM@BC<sub>3</sub> (TM=Fe, Co, Ni, Ru, Rh, and Ag).

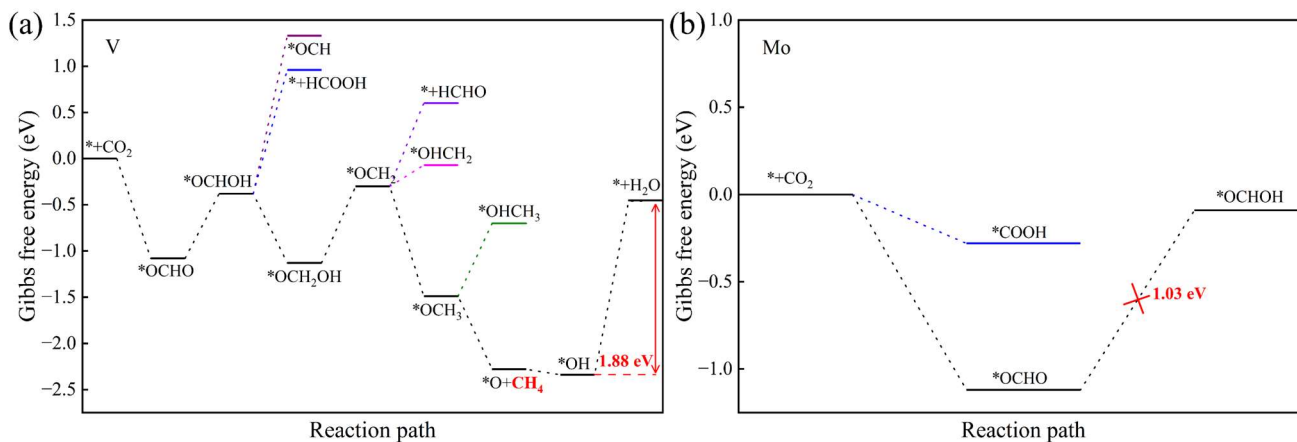

**Fig. S7** The Gibbs free energy diagrams of CO<sub>2</sub>RR on (a) V@BC<sub>3</sub> and (b) Mo@BC<sub>3</sub>.

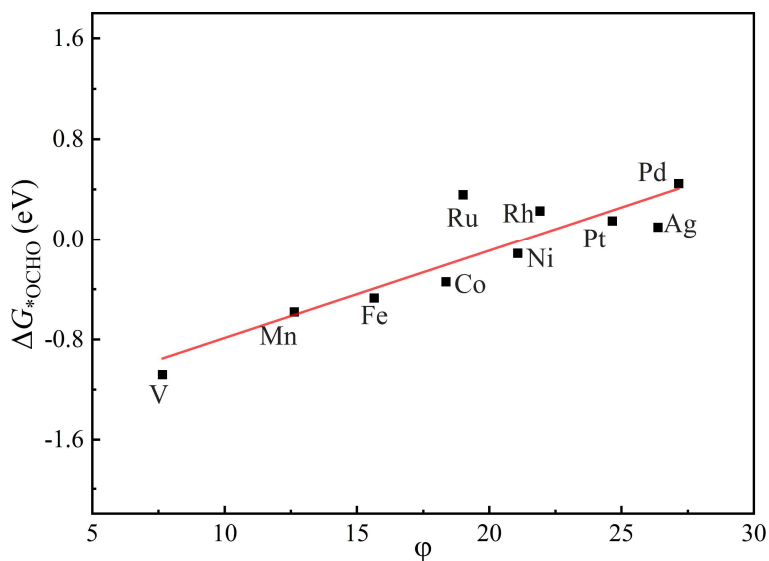

**Fig. S8** Relationship between  $\Delta G^*_{\text{OCHO}}$  and descriptor  $\phi$ .

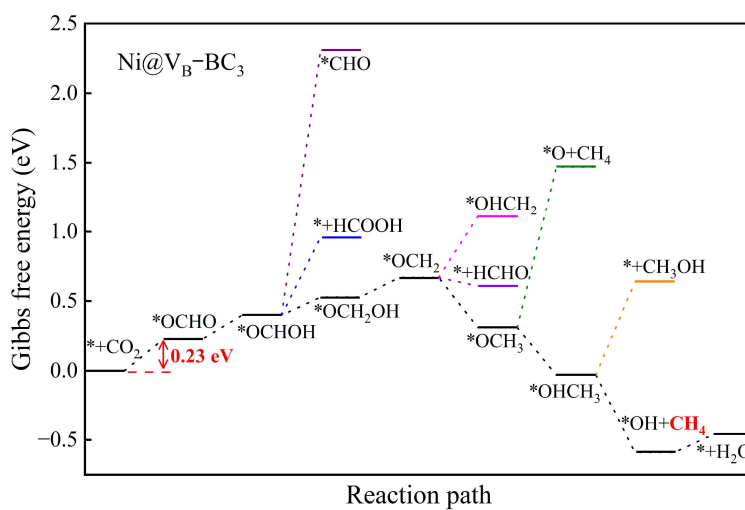

**Fig. S9** The Gibbs free energy diagram of CO<sub>2</sub>RR on Ni@V<sub>B</sub>-BC<sub>3</sub>.

**Table S1.** Binding energy  $E_b$  (in eV) of TM@BC<sub>3</sub> and the ratio of binding energy and cohesion energy $(E_b/E_c)$ 

| TM@BC <sub>3</sub> | $E_b$ | $E_b/E_c$ |
|--------------------|-------|-----------|
| V                  | -5.77 | 0.98      |
| Mn                 | -4.79 | 1.19      |
| Fe                 | -5.86 | 1.11      |
| Co                 | -6.55 | 1.18      |
| Ni                 | -6.39 | 1.23      |
| Cu                 | -4.10 | 1.02      |
| Mo                 | -5.84 | 0.93      |
| Ru                 | -7.82 | 1.16      |
| Rh                 | -7.33 | 1.22      |
| Pd                 | -5.48 | 1.46      |
| Ag                 | -2.70 | 1.07      |
| Pt                 | -7.71 | 1.38      |
